# Supplementary material for: Two-in-one alcohol-processed PEDOT electrodes produced by solvent exchange for organic solar cells
Source: Royal Society of Chemistry journal article supplement (doi:10.1039/d2ee04183a), 2023-01-01
Supplement: d2ee04183a1.pdf [file d2ee04183a1.pdf]

Supporting Information

**Two-in-one Alcohol-processed PEDOT Electrode Produced by  
Solvent Exchange for Organic Solar Cells**

Xinyun Dong<sup>†</sup>, Xianmin Zhou<sup>†</sup>, Yang Liu, Sixing Xiong, Jingyu Cheng, Youyu Jiang\*  
and Yinhua Zhou\*

*Wuhan National Laboratory for Optoelectronics, Huazhong University of Science and  
Technology, Wuhan 430074, China*

\*Corresponding author: youyujiang@hust.edu.cn (Y.J.), yh\_zhou@hust.edu.cn (Y.Z.)

<sup>†</sup>These authors contributed equally to this work.

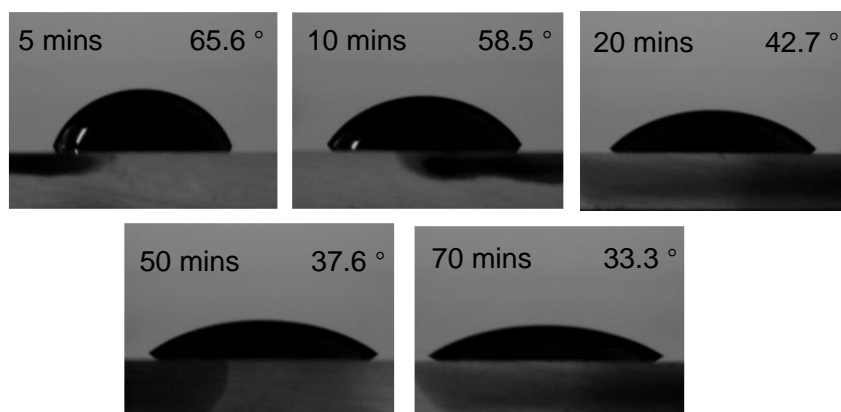

**Figure S1.** Contact angle images for *e*-PEDOT:PSS on PM6:BTP-eC9:PC<sub>71</sub>BM surface with different treatment time.

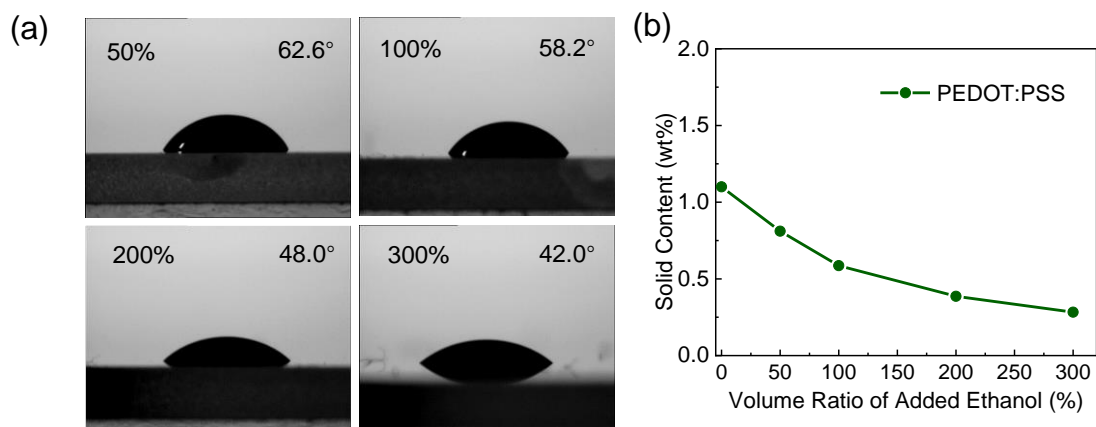

**Figure S2.** a) Contact angle images for diluted *a*-PEDOT:PSS with different volume ratios of ethanol on PM6:BTP-eC9:PC<sub>71</sub>BM surface. b) Solid contents of diluted *a*-PEDOT:PSS.

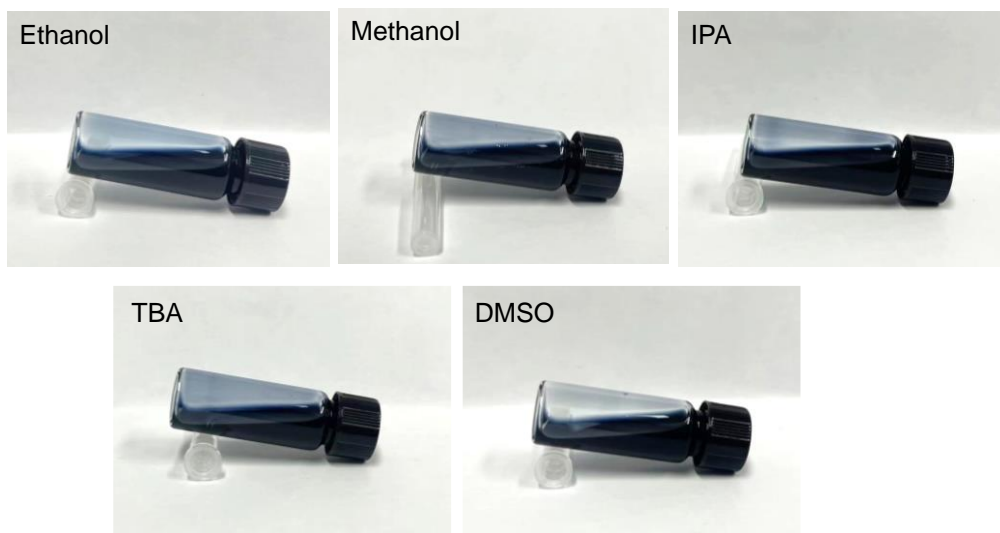

**Figure S3.** Optical images for the redispersed PEDOT:PSS in different solvents.

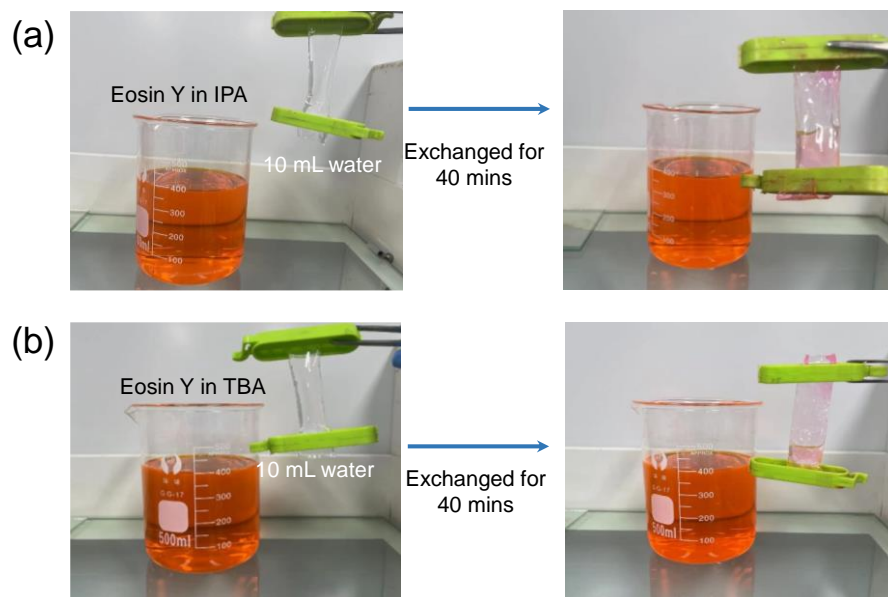

**Figure S4.** Pictures of water in the dialysis membrane and Eosin Y solution in a) IPA or b) TBA before and after solvent exchange.

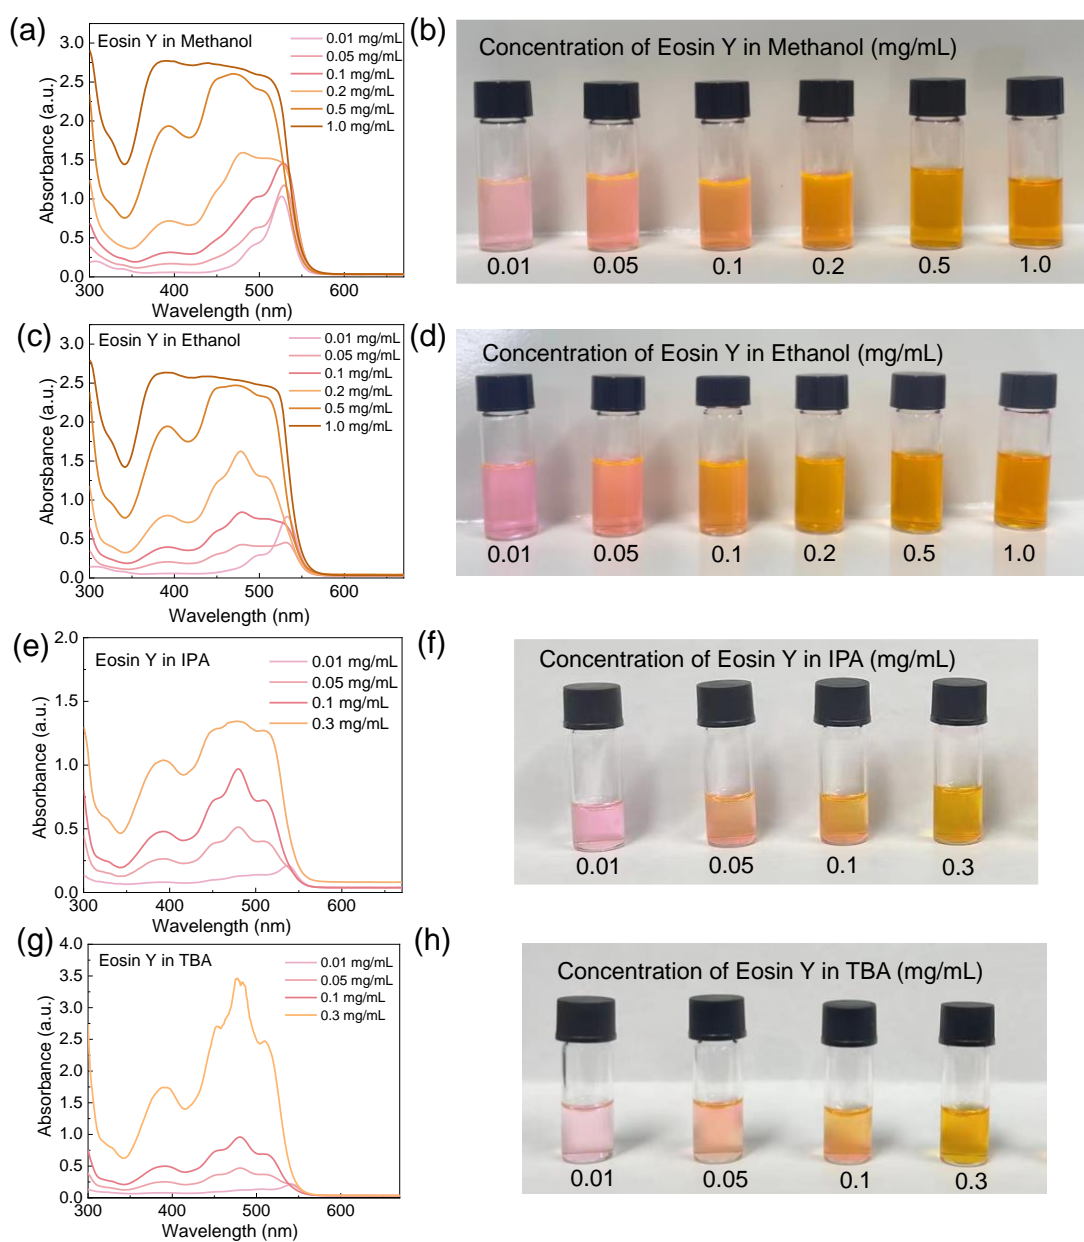

**Figure S5.** Absorbance spectra of Eosin Y dissolved in a) methanol, c) ethanol, e) IPA and g) TBA with different concentrations. Corresponding photographs of Eosin Y solution in b) methanol, d) ethanol, f) IPA and h) TBA.

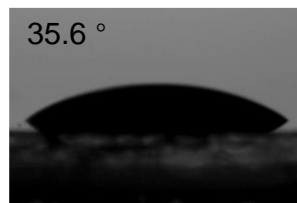

*e*-PEDOT:PSS  
(3 wt% PEDOT:F)

**Figure S6.** Contact angle image of *e*-PEDOT:PSS with the addition of PEDOT:F.

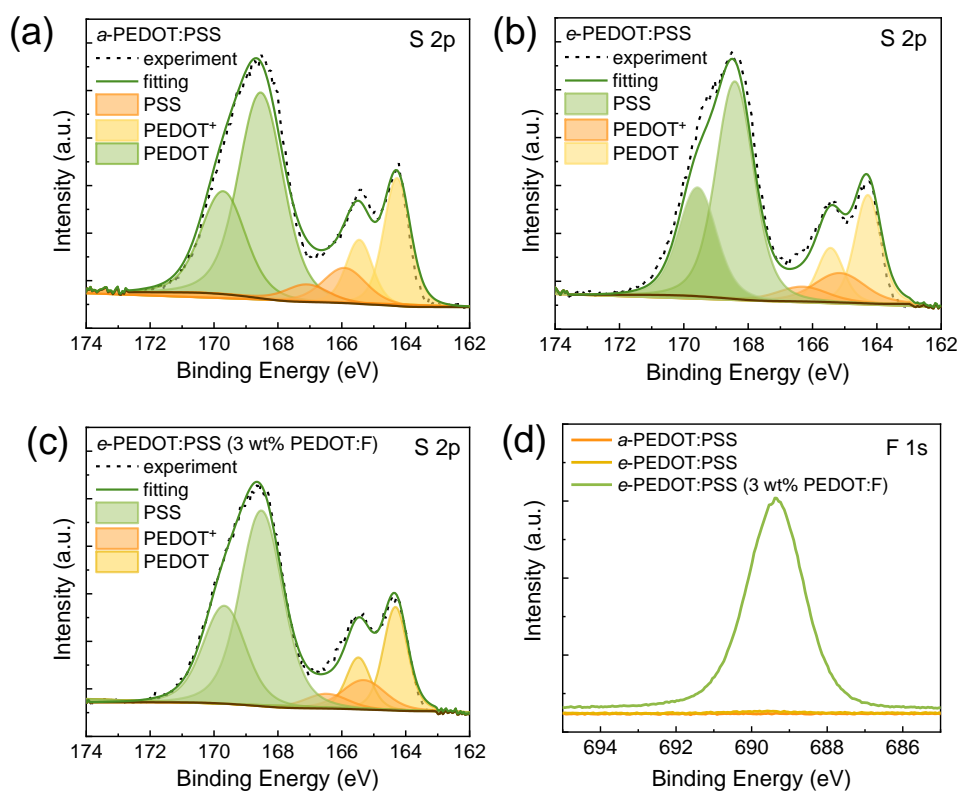

**Figure S7.** XPS spectra of *a*-PEDOT:PSS and *e*-PEDOT:PSS films; a-c) S 2p signals of *a*-PEDOT:PSS, *e*-PEDOT:PSS and *e*-PEDOT:PSS (3 wt% PEDOT:F). The doping levels of *a*-PEDOT:PSS, *e*-PEDOT:PSS and *e*-PEDOT:PSS (3 wt% PEDOT:F) are 30.9%, 33.3% and 33.5%, respectively; d) F 1s signal of *a*-PEDOT:PSS and *e*-PEDOT:PSS with the addition of PEDOT:F.



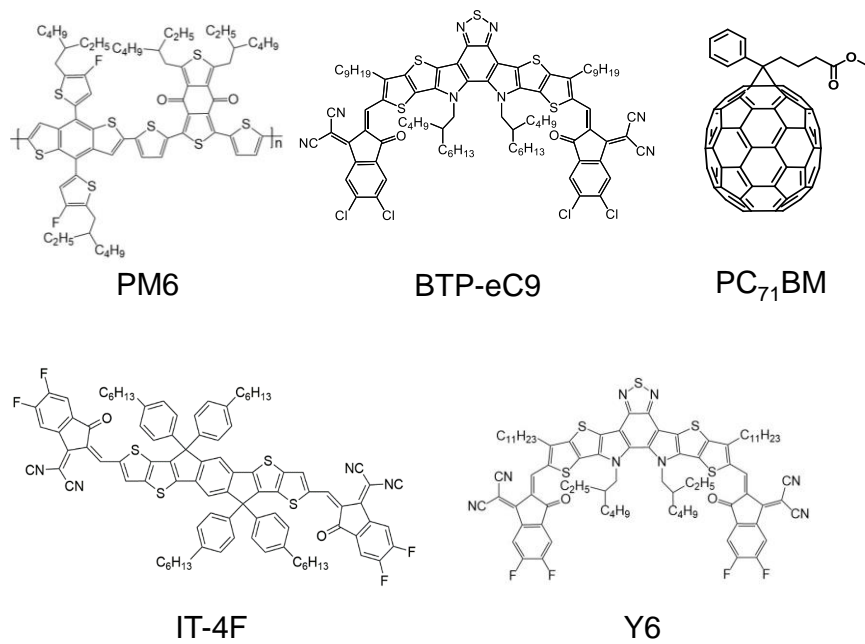

**Figure S8.** Molecular structures of polymer donor and non-fullerene acceptor used in OSCs.

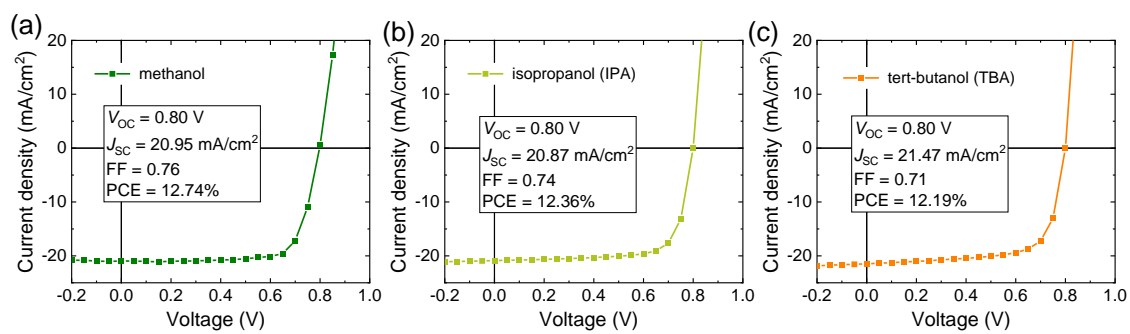

**Figure S9.**  $J$ - $V$  curves for OSCs based on doctor-bladed PEDOT:PSS processed from a) methanol, b) isopropanol and c) tert-butanol. The device structure is ITO/PEI-Zn/PM6:BTP-eC9:PC<sub>71</sub>BM/PEDOT:PSS processed from different alcohols.

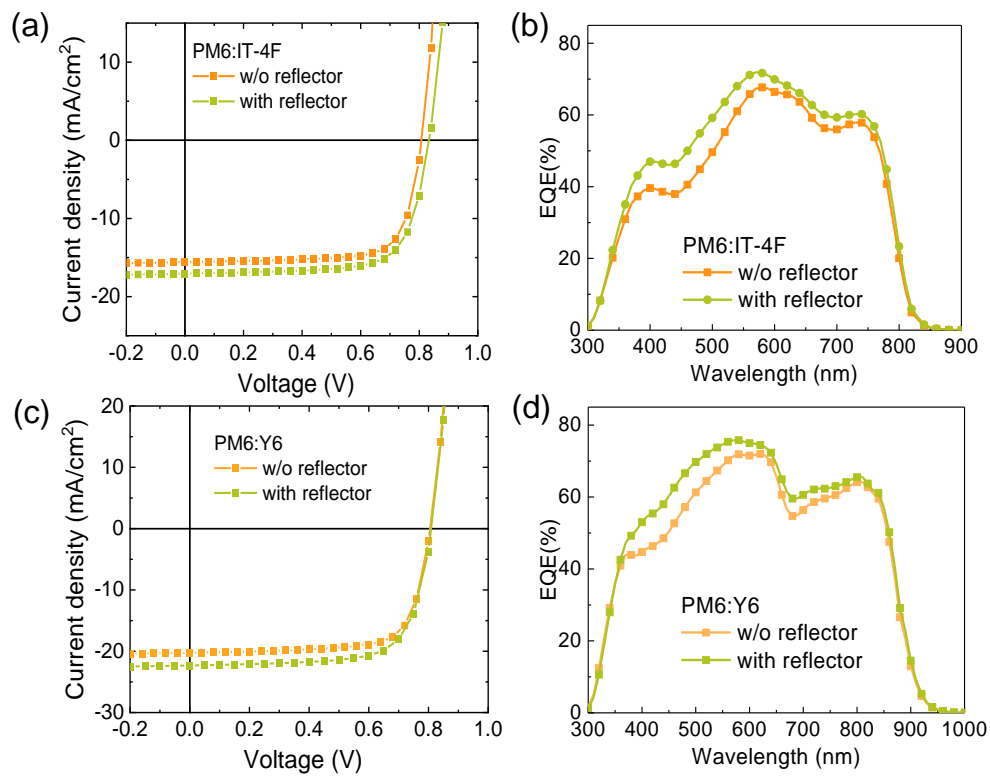

**Figure S10.** *J-V* curves and corresponding EQE spectra for OSCs based on doctor-bladed *e*-PEDOT:PSS top electrode with the active layers of a-b) PM6:IT-4F and c-d) PM6:Y6.

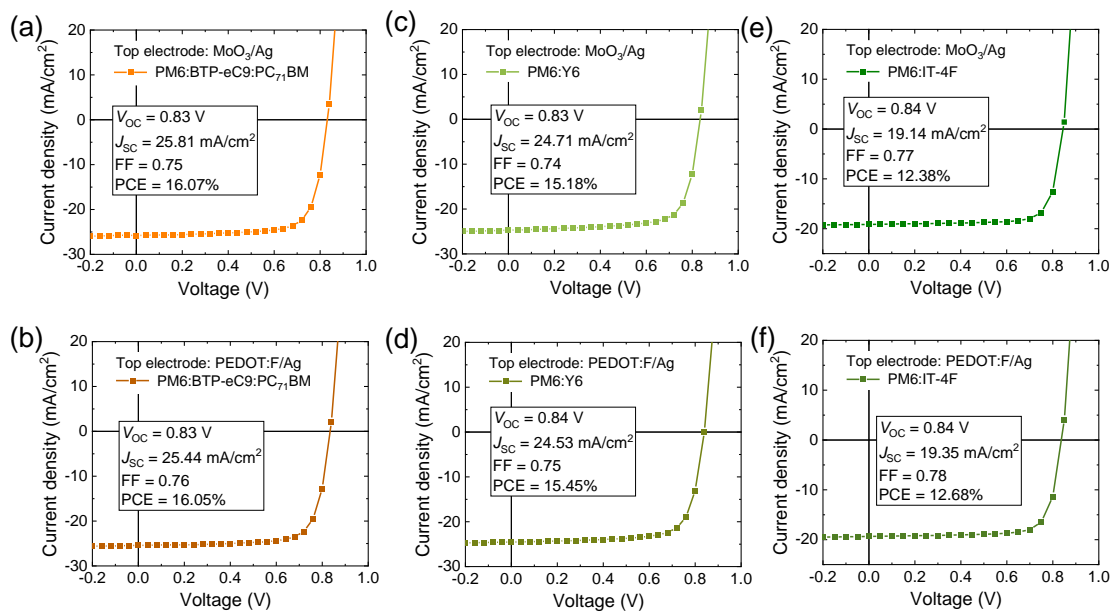

**Figure S11.**  $J-V$  curves for reference OSCs based on  $\text{MoO}_3/\text{Ag}$  and PEDOT:F/Ag top electrode with the active layers of a-b) PM6:BTP-eC9:PC<sub>71</sub>BM, c-d) PM6:Y6 and e-f) PM6:IT-4F.

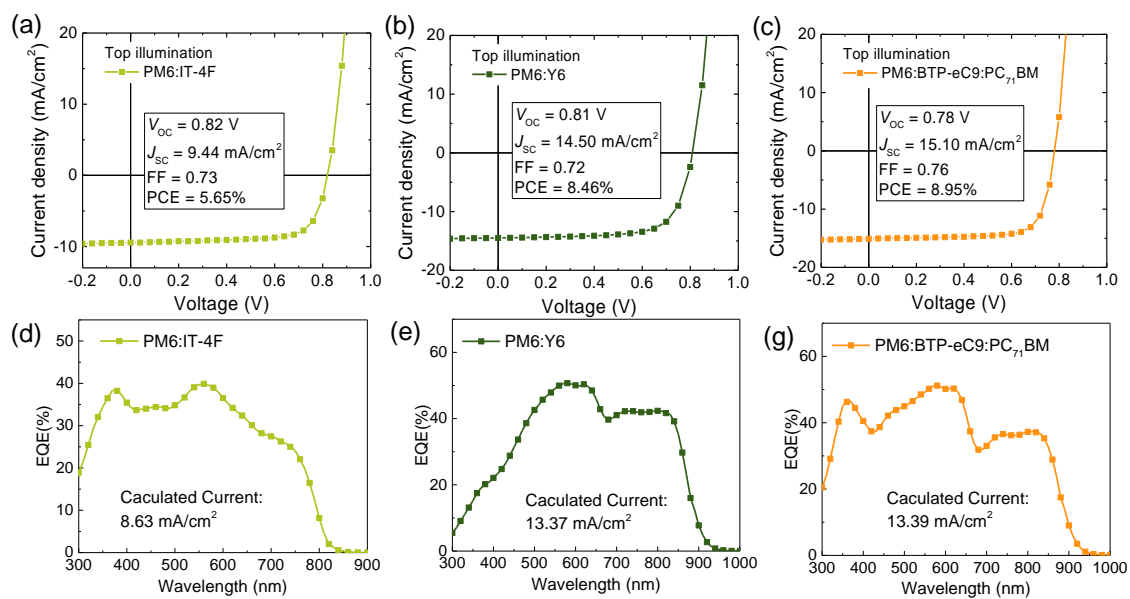

**Figure S12.** Top-illuminated  $J-V$  curves and corresponding EQE spectra for OSCs based on doctor-bladed  $e$ -PEDOT:PSS top electrode.

**Table S1.** Summary of the device structures and efficiencies of OPVs based on 2-in-1 printable top electrodes in the literature.

|             | Device Structure                                                                      | Area                                                     | PCE (%)                      | Reference        |
|-------------|---------------------------------------------------------------------------------------|----------------------------------------------------------|------------------------------|------------------|
| 2011        | Glass/ITO/PEDOT:PSS/P3HT:PCBM/Ag Ink                                                  | -                                                        | 2.25                         | 1                |
| 2014        | PET/printed Cu/PEI/P3HT:PC <sub>61</sub> BM/PEDOT:PSS                                 | -                                                        | 2.77                         | 2                |
| 2015        | PES/H <sub>3</sub> PO <sub>4</sub> -PEDOT:PSS/PEI/P3HT:ICBA/EG-PEDOT:PSS              | -                                                        | 3.3                          | 3                |
| 2017        | Ag ink/ZnO/PBTZT-stat-BDTT-8:PCBM/PEDOT:PSS:Ag NWs                                    | 19.7 cm <sup>2</sup>                                     | 3.6                          | 4                |
| 2018        | Glass/ITO/P3HT:ICBA:PEI/PEDOT:PSS                                                     | 1 cm <sup>2</sup>                                        | 4.1                          | 5                |
| 2020        | Glass/ITO/ZnO NPs/PTB7-Th:EH-IDTBR/PEDOT:PSS (ionic liquid)                           | 4.64 mm <sup>2</sup>                                     | 6.32                         | 6                |
| 2020        | Glass/ITO/ZnO/PM6:IT-4F(with DIO)/PM6:IT-4F(without DIO)/PEDOT:PSS                    | 0.03 cm <sup>2</sup>                                     | 10.1                         | 7                |
| 2021        | TPU/Ag NWs/PEDOT:PSS/PTB7-Th:IEICO-4F/EGaIn                                           | -                                                        | 10.1                         | 8                |
| 2021        | Glass/ITO/ZnO/PCE10:IEICO-4F/Ω-PEDOT                                                  | 0.1 cm <sup>2</sup>                                      | 8.21                         | 9                |
| <b>2023</b> | <b>Glass/ITO/PEI-Zn/PM6:BTP-eC9:PC<sub>71</sub>BM/e-PEDOT:PSS (without reflector)</b> | <b>0.04 cm<sup>2</sup></b><br><b>23.8 cm<sup>2</sup></b> | <b>12.80</b><br><b>10.94</b> | <b>This Work</b> |

## Reference

1. L. Polavarapu, K. K. Manga, H. D. Cao, K. P. Loh and Q.-H. Xu, *Chem. Mater.*, 2011, **23**, 3273-3276.
2. K. Li, H. Zhen, L. Niu, X. Fang, Y. Zhang, R. Guo, Y. Yu, F. Yan, H. Li and Z. Zheng, *Adv. Mater.*, 2014, **26**, 7271-7278.
3. W. Meng, R. Ge, Z. Li, J. Tong, T. Liu, Q. Zhao, S. Xiong, F. Jiang, L. Mao and Y. Zhou, *ACS Appl. Mater. Interfaces*, 2015, **7**, 14089-14094.
4. M. Koppitz, N. Hesse, D. Landerer, L. Graf von Reventlow, E. Wegner, J. Czolk and A. Colmann, *Energy Technol.*, 2017, **5**, 1105-1111.
5. L. Mao, B. Luo, L. Sun, S. Xiong, J. Fan, F. Qin, L. Hu, Y. Jiang, Z. Li and Y. Zhou, *Mater. Horiz.*, 2018, **5**, 123-130.
6. H. Park, J. H. Lee, S. Lee, S. Y. Jeong, J. W. Choi, C. L. Lee, J. H. Kim and K. Lee, *ACS Appl. Mater. Interfaces*, 2020, **12**, 2276-2284.
7. W. Wang, F. Qin, X. Zhu, Y. Liu, X. Jiang, L. Sun, C. Xie and Y. Zhou, *ACS Appl. Mater. Interfaces*, 2020, **12**, 3800-3805.
8. Z. Wang, M. Xu, Z. Li, Y. Gao, L. Yang, D. Zhang and M. Shao, *Adv. Funct. Mater.*, 2021, **31**, 2103534.
9. D. Corzo, E. Bihar, E. B. Alexandre, D. Rosas-Villalva and D. Baran, *Adv. Funct. Mater.*, 2020, **31**.

**Table S2.** Photovoltaic parameters of OSCs based on *e*-PEDOT:PSS top electrode added with different ratios of PEDOT:F. The active layer of OSCs is PM6:BTP-eC9:PC<sub>71</sub>BM.

| <b>Concentration of PEDOT:F</b> | <b><math>V_{oc}</math> (V)</b> | <b><math>J_{sc}</math> (mA/cm<sup>2</sup>)</b> | <b>FF</b>   | <b>PCE (%)</b> |
|---------------------------------|--------------------------------|------------------------------------------------|-------------|----------------|
| without                         | 0.77 ± 0.01                    | 21.26 ± 0.21                                   | 0.72 ± 0.01 | 11.83 ± 0.10   |
| 3 wt%                           | 0.82 ± 0.01                    | 21.19 ± 0.26                                   | 0.74 ± 0.01 | 12.80 ± 0.24   |
